# Supplementary material
Source: MDPI journal article supplement (https://www.mdpi.com/2227-9717/9/10/1829)
Supplement: s1 [file s1]

**Table S1.** Adsorption kinetic models, equations and parameters for single and binary metal systems.

| Models                  | Equations                                     | Parameters                                                                                                                                                                                                                                                                                                                                                       |
|-------------------------|-----------------------------------------------|------------------------------------------------------------------------------------------------------------------------------------------------------------------------------------------------------------------------------------------------------------------------------------------------------------------------------------------------------------------|
| pseudo-first-order      | $q_t = q_e (1 - e^{-k_1 t})$                  | $q_e$ (mg g <sup>-1</sup> ) is the adsorption amounts of metal ion by E-CMBC at equilibrium, and $q_t$ (mg g <sup>-1</sup> ) is the adsorption amounts of metal ion at time $t$ (min); the parameters $k_1$ (min <sup>-1</sup> ), $k_2$ (g mg <sup>-1</sup> min <sup>-1</sup> ), and $k_3$ (min <sup>-1</sup> ) are the adsorption rate constants, respectively. |
| pseudo-second-order     | $q_t = \frac{k_2 q_e^2 t}{1 + k_2 q_e t}$     |                                                                                                                                                                                                                                                                                                                                                                  |
| Avrami fractional-order | $q_t = q_e \left[ 1 - e^{-(k_3 t)^n} \right]$ |                                                                                                                                                                                                                                                                                                                                                                  |

**Table S2.** Adsorption isotherm models, equations and parameters for single and binary metal systems.

| Models     | Equations                               | Parameters                                                                                                                                                                                                                                                                                                                                                                                                                                                              |
|------------|-----------------------------------------|-------------------------------------------------------------------------------------------------------------------------------------------------------------------------------------------------------------------------------------------------------------------------------------------------------------------------------------------------------------------------------------------------------------------------------------------------------------------------|
| Langmuir   | $q_e = \frac{q_m K_L c_e}{1 + K_L c_e}$ | $q_e$ (mg g <sup>-1</sup> ) is the adsorption capacity at equilibrium, $q_m$ (mg g <sup>-1</sup> ) is the maximum adsorption capacity, $c_0$ (mg L <sup>-1</sup> ) is the initial concentration, and $c_e$ (mg L <sup>-1</sup> ) is the concentration at equilibrium. $K_L$ (L mg <sup>-1</sup> ) is the Langmuir constant related to the affinity of the binding sites, $K_F$ is the Freundlich constant related to sorption capacity, $n$ is the empirical parameter. |
| Freundlich | $q_e = K_F c_e^{1/n}$                   |                                                                                                                                                                                                                                                                                                                                                                                                                                                                         |

**Table S3.** Adsorption kinetic model parameters for Cd<sup>2+</sup>, Cu<sup>2+</sup> and Ni<sup>2+</sup> on E-CMBC in binary-metal system.

| system                             | pseudo-first-order          |       | pseudo-second-order                           |       | Avrami fractional-order     |       |
|------------------------------------|-----------------------------|-------|-----------------------------------------------|-------|-----------------------------|-------|
| Cd <sup>2+</sup> -Ni <sup>2+</sup> |                             |       |                                               |       |                             |       |
|                                    | $q_e$ (mg g <sup>-1</sup> ) | 31.80 | $q_e$ (mg g <sup>-1</sup> )                   | 32.71 | $q_e$ (mg g <sup>-1</sup> ) | 33.43 |
| Cd <sup>2+</sup>                   | $k_1$ (min <sup>-1</sup> )  | 0.22  | $k_2$ (g mg <sup>-1</sup> min <sup>-1</sup> ) | 0.013 | $k_3$ (min <sup>-1</sup> )  | 0.36  |
|                                    | $R^2$                       | 0.74  | $R^2$                                         | 0.94  | $R^2$                       | 0.99  |
|                                    | $q_e$ (mg g <sup>-1</sup> ) | 25.74 | $q_e$ (mg g <sup>-1</sup> )                   | 26.52 | $q_e$ (mg g <sup>-1</sup> ) | 26.64 |
| Ni <sup>2+</sup>                   | $k_1$ (min <sup>-1</sup> )  | 0.19  | $k_2$ (g mg <sup>-1</sup> min <sup>-1</sup> ) | 0.013 | $k_3$ (min <sup>-1</sup> )  | 0.24  |
|                                    | $R^2$                       | 0.86  | $R^2$                                         | 0.97  | $R^2$                       | 0.96  |
| Cu <sup>2+</sup> -Ni <sup>2+</sup> |                             |       |                                               |       |                             |       |
|                                    | $q_e$ (mg g <sup>-1</sup> ) | 29.4  | $q_e$ (mg g <sup>-1</sup> )                   | 29.96 | $q_e$ (mg g <sup>-1</sup> ) | 30.34 |
| Cu <sup>2+</sup>                   | $k_1$ (min <sup>-1</sup> )  | 0.33  | $k_2$ (g mg <sup>-1</sup> min <sup>-1</sup> ) | 0.027 | $k_3$ (min <sup>-1</sup> )  | 1.51  |
|                                    | $R^2$                       | 0.59  | $R^2$                                         | 0.92  | $R^2$                       | 0.98  |
|                                    | $q_e$ (mg g <sup>-1</sup> ) | 17.76 | $q_e$ (mg g <sup>-1</sup> )                   | 17.94 | $q_e$ (mg g <sup>-1</sup> ) | 18.07 |
| Ni <sup>2+</sup>                   | $k_1$ (min <sup>-1</sup> )  | 0.43  | $k_2$ (g mg <sup>-1</sup> min <sup>-1</sup> ) | 0.086 | $k_3$ (min <sup>-1</sup> )  | 9.59  |
|                                    | $R^2$                       | 0.79  | $R^2$                                         | 0.90  | $R^2$                       | 0.88  |
| Cu <sup>2+</sup> -Cd <sup>2+</sup> |                             |       |                                               |       |                             |       |
|                                    | $q_e$ (mg g <sup>-1</sup> ) | 43.24 | $q_e$ (mg g <sup>-1</sup> )                   | 45.05 | $q_e$ (mg g <sup>-1</sup> ) | 46.25 |
| Cu <sup>2+</sup>                   | $k_1$ (min <sup>-1</sup> )  | 0.14  | $k_2$ (g mg <sup>-1</sup> min <sup>-1</sup> ) | 0.005 | $k_3$ (min <sup>-1</sup> )  | 0.12  |
|                                    | $R^2$                       | 0.75  | $R^2$                                         | 0.94  | $R^2$                       | 0.98  |

**Table S4.** Adsorption isotherm model parameters for  $\text{Cd}^{2+}$  and  $\text{Ni}^{2+}$  on E-CMBC in  $\text{Cd}^{2+}$ - $\text{Ni}^{2+}$  system.

| system                              | Langmuir model           |                          |       | Freundlich model         |                          |       |
|-------------------------------------|--------------------------|--------------------------|-------|--------------------------|--------------------------|-------|
|                                     | $q_m (\text{mg g}^{-1})$ | $K_L (\text{L mg}^{-1})$ | $R^2$ | $q_m (\text{mg g}^{-1})$ | $K_L (\text{L mg}^{-1})$ | $R^2$ |
| $\text{Cd}^{2+}$ - $\text{Ni}^{2+}$ |                          |                          |       |                          |                          |       |
| $\text{Cd}^{2+}$                    | 32.63                    | 12.56                    | 0.94  | 21.45                    | 0.11                     | 0.85  |
| $\text{Ni}^{2+}$                    | 26.93                    | 39.39                    | 0.96  | 19.90                    | 0.074                    | 0.78  |
